# Supplementary material
Source: PubMed Central journal article supplement (PMC7960324)
Supplement: 15-00832.pdf [file 15-00832.pdf]

**On-line Table: Post hoc pair-wise comparisons<sup>a</sup> of the identified tissue components**

|                            | Lipid Accumulation | Fibrous Tissue     | Fibrous Cap        | Calcifications     |
|----------------------------|--------------------|--------------------|--------------------|--------------------|
| <i>T1</i> relaxation time  |                    |                    |                    |                    |
| Fibrous tissue             | <.001 <sup>b</sup> | –                  | –                  | –                  |
| Fibrous cap                | <.001 <sup>b</sup> | .155               | –                  | –                  |
| Calcifications             | <.001 <sup>b</sup> | <.001 <sup>b</sup> | .001 <sup>b</sup>  | –                  |
| Vessel wall                | <.001 <sup>b</sup> | .004 <sup>b</sup>  | .691               | .002 <sup>b</sup>  |
| <i>PD</i> value            |                    |                    |                    |                    |
| Fibrous tissue             | .052               | –                  | –                  | –                  |
| Fibrous cap                | .068               | .998               | –                  | –                  |
| Calcifications             | <.001 <sup>b</sup> | <.001 <sup>b</sup> | <.001 <sup>b</sup> | –                  |
| Vessel wall                | .108               | .323               | .288               | <.001 <sup>†</sup> |
| <i>T2</i> relaxation time  |                    |                    |                    |                    |
| Fibrous tissue             | .522               | –                  | –                  | –                  |
| Fibrous cap                | .164               | .878               | –                  | –                  |
| Calcifications             | <.001 <sup>b</sup> | .014 <sup>b</sup>  | .375               | –                  |
| Vessel wall                | <.001 <sup>b</sup> | .011 <sup>b</sup>  | .446               | .986               |
| <i>T2*</i> relaxation time |                    |                    |                    |                    |
| Fibrous tissue             | .065               | –                  | –                  | –                  |
| Fibrous cap                | .793               | .688               | –                  | –                  |
| Calcifications             | .003 <sup>b</sup>  | <.001 <sup>b</sup> | .005 <sup>b</sup>  | –                  |
| Vessel wall                | .994               | .079               | .884               | 0.001 <sup>b</sup> |

<sup>a</sup> Games-Howell post hoc tests were performed for pair-wise comparisons. Data are *P* values.

<sup>b</sup> *P* < .05.
